# Supplementary material
Source: Springer Nature journal article supplement (https://www.springermedizin.de/resource/supplementary/13550_2013_169_MOESM4_ESM.pdf/9687740)

2.4637  
to: 21 % (2.46)

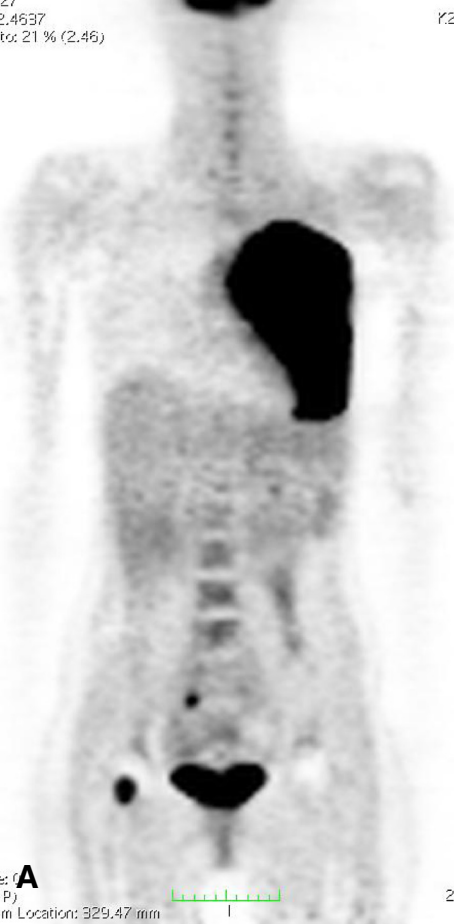

7.26  
B  
% (0.91)

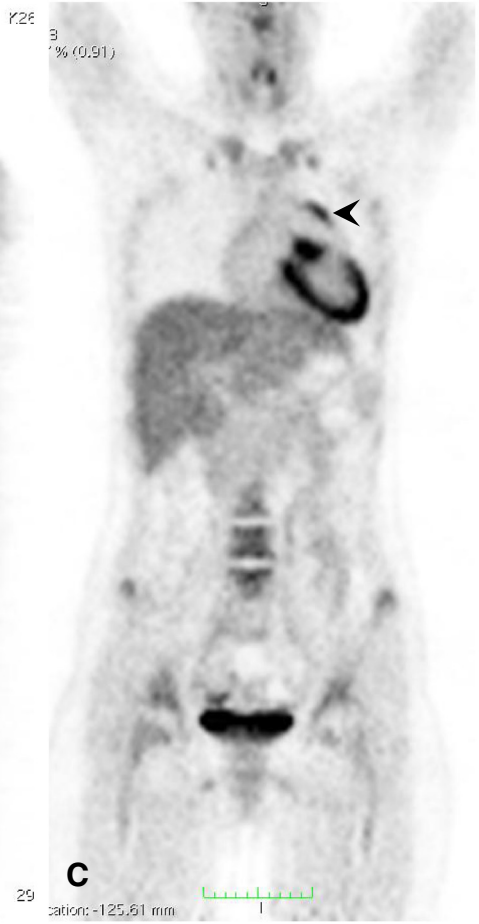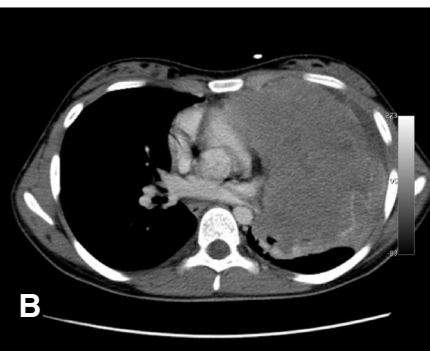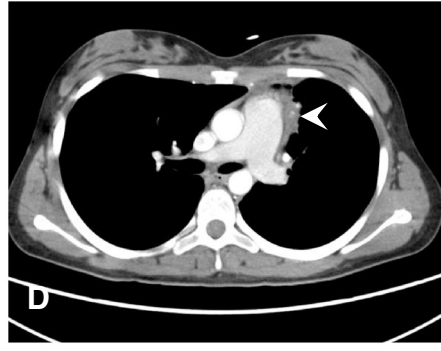

Supplement: MOESM4 [file 9687740]
